# Supplementary material for: Specific visual expertise reduces susceptibility to visual illusions
Source: Springer Nature journal article supplement (doi:10.1038/s41598-025-88178-y), 2025-03-12
Supplement: MOESM1 [file 41598_2025_88178_MOESM1_ESM.pdf]

## Supplementary Materials – Model Building Sequences

### General Information

Non-experts were coded as -0.5 while experts were coded as 0.5. Stimuli size difference (%) between comparison stimuli was coded as 2, 6, 10, 14, and 18 for the Ebbinghaus and Shepard Tabletops illusions, and 4, 12, 20, 28, and 36 for the Muller-Lyer and Ponzo illusions. The dependent variable was response accuracy – for each trial per VI the participant could score 0 (incorrect answer) or 1 (correct answer). The likelihood of responding correctly was 50%. Data were analysed via generalised linear mixed effects models in R (R Core Team, 2019) using the glmer function from the lme4 package (Bates et al., 2015).

### Ebbinghaus Illusion

The baseline model (Model 1) contained a by-participant random intercept with a random slope of stimuli size difference ( $z = -18.36, p < .001$ ). Then, the fixed effect of the group was added (Model 2), significantly improving the fit compared to the baseline model (Model 1:  $\chi^2 = 11.92, p < .001$ ). We then added the stimuli size difference (Model 3) which improved the model fit over the baseline model (Model 1:  $\chi^2 = 183.16, p < .001$ ). Furthermore, we included both effects combined (Model 4), which also improved the model fit over the previous two models (Models 2 and 3;  $\chi^2 = 188.35, p < .001$ ;  $\chi^2 = 17.11, p < .001$ , respectively). Finally, adding an interaction effect between stimuli size difference and group (Model 5) did not significantly improve the model (Model 4:  $\chi^2 = 1.01, p < .315$ ).

While testing individual differences, adding age (Model 6) did not significantly improve the best-fitting model (Model 3;  $\chi^2 = 1.72, p = .190$ ), while adding sex as a factor (Model 7) marginally improved it (Model 7:  $\chi^2 = 4.27, p = .039$ ). Both years of experience (Model 8) and images per day (Model 9) failed to improve the base-fitting model (Model 3;  $\chi^2 < 0.01, p = .948$ ;  $\chi^2 < 0.01, p = .978$ ).

## Ponzo Illusion

The baseline model (Model 1) contained a by-participant random intercept with a random slope of stimuli size difference ( $z = -11.13, p < .001$ ). Then, the fixed effect of the group was added (Model 2), significantly improving the fit compared to the baseline model (Model 1:  $\chi^2 = 4.69, p = .030$ ). We then added the stimuli size difference (Model 3) which improved the model fit over the baseline model (Model 1:  $\chi^2 = 282.34, p < .001$ ). Furthermore, we included both effects combined (Model 4), which also improved the model fit over the previous two models (Model 2 and 3:  $\chi^2 = 283.88, p < .001$ ;  $\chi^2 = 6.23, p = .013$ , respectively). Finally, adding an interaction effect between stimuli size difference and group (Model 5) did not significantly improve the model (Model 4:  $\chi^2 = 2.35, p < .125$ ).

While testing individual differences, adding age (Model 6) did not significantly improve the best-fitting model (Model 4:  $\chi^2 = 1.21, p = .272$ ), while adding sex as a factor (Model 7) also improved the model (Model 4:  $\chi^2 = 5.56, p = .018$ ). Both years of experience and images per day (Models 8 and 9) failed to improve the best-fitting model (Model 4:  $\chi^2 = 0.01, p = .815$ ;  $\chi^2 = 1.84, p = .178$ ).

## Muller-Lyer Illusion

The baseline model (Model 1) contained a by-participant random intercept with a random slope of stimuli size difference ( $z = -18.36, p < .001$ ). Then, the fixed effect of the group (Model 2) was added, significantly improving the fit compared to the baseline model (Model 1:  $\chi^2 = 15.44, p < .001$ ). We then added the stimuli size difference (Model 3) which improved the model fit over the baseline model (Model 1:  $\chi^2 = 282.45, p < .001$ ). Furthermore, we included both effects combined (Model 4), which also improved the model fit over the previous two models (Models 2 and 3:  $\chi^2 = 279.36, p < .001$ ;  $\chi^2 = 12.35, p < .001$ , respectively). Finally, adding an interaction effect between stimuli size difference and group (Model 5)

significantly improved the model (Model 4:  $\chi^2 = 9.93$ ,  $p = .002$ ). The interaction is deconstructed in the main text.

While testing individual differences, adding age (Model 6) did not significantly improve the best-fitting model ( $\chi^2 = 0.14$ ,  $p = .713$ ), while adding sex as a factor (Model 7) also improved the model ( $\chi^2 = 0.47$ ,  $p = .495$ ). Both years of experience and images per day failed to improve the best-fitting model (Models 8 and 9:  $\chi^2 = 0.62$ ,  $p = .431$ ;  $\chi^2 = 1.95$ ,  $p = .163$ ).

### **Shepard Tabletops Illusion**

The baseline model (Model 1) contained a by-participant random intercept with a random slope of stimuli size difference ( $z = -18.36$ ,  $p < .001$ ). Then, the fixed effect of the group was added (Model 2), which did not significantly improve the fit compared to the baseline model (Model 2:  $\chi^2 = 1.08$ ,  $p = .300$ ). We then added the stimuli size difference (Model 3) which improved the model fit over the baseline model (Model 1:  $\chi^2 = 234.98$ ,  $p < .001$ ). Including both factors together (Model 4) improved the model fit over the group-only model (Model 2:  $\chi^2 = 235.14$ ,  $p < .001$ ) but not the stimuli size difference-only model (Model 3:  $\chi^2 = 1.24$ ,  $p = .265$ ). Finally, adding an interaction effect between stimuli size difference and group (Model 5) did not significantly improve the model (Model 3:  $\chi^2 = 3.37$ ,  $p < .186$ ).

While testing individual differences, adding age (Model 6) did not significantly improve the best-fitting model (Model 3:  $\chi^2 = 1.53$ ,  $p = .465$ ), while adding sex as a factor (Model 7) also did not improve the model (Model 3:  $\chi^2 = 2.55$ ,  $p = .279$ ). Years of experience (Model 8) failed to improve the model (Model:  $\chi^2 = 0.61$ ,  $p = .433$ ) and images per day (Model 9) improved the best-fitting model (Model 3:  $\chi^2 = 4.82$ ,  $p = .028$ ).

### **Pairwise Comparisons**

For experts, the Ebbinghaus illusion's scores ( $M = 9.16$ ,  $SD = 5.16$ ) significantly differed from Ponzo's ( $M = 12.05$ ,  $SD = 3.00$ ;  $t(44) = -4.40$ ,  $p < .001$ ,  $d = -0.64$ ,  $BF_{10} = 193.60$ )

and Shepard's ( $M = 6.86$ ,  $SD = 3.15$ ;  $t(44) = 3.50$ ,  $p = .006$ ,  $d = 0.42$ ,  $BF_{10} = 4.81$ ), but not the Müller-Lyer's ( $M = 9.55$ ,  $SD = 1.78$ ;  $t(44) = -0.59$ ;  $p = 1$ ,  $d = -0.07$ ,  $BF_{10} = 0.18$ ). Furthermore, Ponzo's scores ( $M = 12.05$ ,  $SD = 3.00$ ) differed significantly from Müller-Lyer's scores ( $M = 9.55$ ,  $SD = 1.78$ ;  $t(44) = 3.81$ ;  $p = .002$ ,  $d = 0.66$ ,  $BF_{10} = 283.45$ ) and Shepard's scores ( $M = 6.86$ ,  $SD = 3.15$ ;  $t(44) = 7.90$ ,  $p < .001$ ,  $d = 1.43$ ,  $BF_{10} = 1.914 \times 10^{+9}$ ). Finally, scores for the Müller-Lyer's scores ( $M = 9.55$ ,  $SD = 1.78$ ) differed significantly from Shepard's ( $M = 6.86$ ,  $SD = 3.15$ ;  $t(44) = 4.09$ ,  $p < .001$ ,  $d = 0.74$ ,  $BF_{10} = 1541.84$ ). For the non-experts, the Ebbinghaus illusion's scores ( $M = 5.75$ ,  $SD = 4.61$ ) significantly differed from Ponzo's ( $M = 10.51$ ,  $SD = 3.36$ ;  $t(107) = -11.38$ ,  $p < .001$ ,  $d = -0.97$ ,  $BF_{10} = 1.223 \times 10^{+14}$ ) and Müller-Lyer's ( $M = 8.49$ ,  $SD = 1.76$ ;  $t(107) = -0.51$ ,  $p < .001$ ,  $d = -0.55$ ,  $BF_{10} = 109617.46$ ), but not the Shepard's ( $M = 5.99$ ,  $SD = 2.69$ ;  $t(44) = -0.58$ ;  $p = 1$ ,  $d = -0.05$ ,  $BF_{10} = 0.12$ ). Furthermore, Ponzo's scores ( $M = 10.51$ ,  $SD = 3.36$ ) differed significantly from Müller-Lyer's scores ( $M = 8.49$ ,  $SD = 1.76$ ;  $t(44) = 4.80$ ;  $p < .001$ ,  $d = 0.53$ ,  $BF_{10} = 52167.46$ ) and Shepard's scores ( $M = 5.99$ ,  $SD = 2.69$ ;  $t(44) = 10.74$ ,  $p < .001$ ,  $d = 1.21$ ,  $BF_{10} = 3.304 \times 10^{+19}$ ). Finally, scores for the Müller-Lyer's scores ( $M = 8.49$ ,  $SD = 1.76$ ) differed significantly from Shepard's ( $M = 5.99$ ,  $SD = 2.69$ ;  $t(44) = 5.94$ ,  $p < .001$ ,  $d = 0.76$ ,  $BF_{10} = 2.105 \times 10^{+9}$ ).
